# Supplementary material
Source: ML conference proceedings conference paper supplement (https://proceedings.neurips.cc/paper_files/paper/2023/hash/5f999632c48f87cffb214e575581e4a9-Abstract.html)
Supplement: Supplementary file 1 [file 5f999632c48f87cffb214e575581e4a9-Supplemental-Conference.zip]

Archive with 2 entries (2 files):
- auglasso.py
- full paper.pdf
